# Supplementary material
Source: PubMed Central journal article supplement (PMC6537595)
Supplement: NIHMS1023689-supplement-3.pdf [file NIHMS1023689-supplement-3.pdf]

| Variants   | Allele                                |  | Physical position<br>(Relative to the start<br>codon, bp) | MAF  | P-Value  |
|------------|---------------------------------------|--|-----------------------------------------------------------|------|----------|
|            | (B73 Reference/Alternative<br>allele) |  |                                                           |      |          |
| Indel-2339 | GAG/---                               |  | -2339                                                     | 0.12 | 1.82E-04 |
| SNP-1311   | C/A                                   |  | -1311                                                     | 0.07 | 2.65E-05 |
| Indel-1299 | 34bp insertion/---                    |  | -1299                                                     | 0.07 | 2.65E-05 |
| SNP-1247   | C/G                                   |  | -1247                                                     | 0.10 | 3.88E-07 |
| SNP-1245   | A/G                                   |  | -1245                                                     | 0.10 | 3.88E-07 |
| Indel-1243 | AA/--                                 |  | -1243                                                     | 0.06 | 2.65E-05 |
| Indel-1230 | --/AT                                 |  | -1230                                                     | 0.06 | 2.65E-05 |
| SNP-1146   | A/G                                   |  | -1146                                                     | 0.06 | 2.65E-05 |
| SNP-1117   | G/A                                   |  | -1117                                                     | 0.06 | 2.65E-05 |
| SNP-1096   | A/G                                   |  | -1096                                                     | 0.07 | 1.72E-05 |
| SNP-1087   | G/T                                   |  | -1087                                                     | 0.07 | 1.72E-05 |
| Indel-948  | AGTACCC/-----                         |  | -948                                                      | 0.11 | 2.02E-05 |
| SNP-934    | A/G                                   |  | -934                                                      | 0.11 | 2.02E-05 |

**Table S1. Significant association variants across the 6.3-kb sequenced region around *ZCN8* after Bonferroni multiple test correction ( $P < 4.95E-04$ ). Related to Figure 1.**

| Material                | Location                   | Subspecies                      | Source        | SNP-1245 | Indel-2339 |
|-------------------------|----------------------------|---------------------------------|---------------|----------|------------|
| Ames 21797              | Mazatlan/El Salado         | <i>Z. mays ssp. parviglumis</i> | John Doebley  | A        | Ref        |
| Ames 21826              | El Salado                  | <i>Z. mays ssp. parviglumis</i> | John Doebley  | G        | Ref        |
| Ames 21861              | Unknown                    | <i>Z. mays ssp. parviglumis</i> | John Doebley  | A        | Ref        |
| Ames 21889              | El Rodeo                   | <i>Z. mays ssp. parviglumis</i> | John Doebley  | A        | Ref        |
| CIMMYT ID13580          | Mexico                     | <i>Z. mays ssp. parviglumis</i> | John Doebley  | G        | Ref        |
| PI 384062               | Palo Blanco                | <i>Z. mays ssp. parviglumis</i> | John Doebley  | G        | Ref        |
| PI 384063               | Valle de Bravo,Mexico      | <i>Z. mays ssp. parviglumis</i> | John Doebley  | G        | Ref        |
| PI 384069               | El Pochote                 | <i>Z. mays ssp. parviglumis</i> | John Doebley  | A        | Ref        |
| PI 566686               | Paso de Morelos,<br>Mexico | <i>Z. mays ssp. parviglumis</i> | John Doebley  | G        | Ref        |
| PI 566692               | Tuzantla                   | <i>Z. mays ssp. parviglumis</i> | John Doebley  | A        | Ref        |
| TIL1                    | Tzitzio, Michoacan         | <i>Z. mays ssp. parviglumis</i> | John Doebley  | G        | Ref        |
| TIL11                   | Huitzucu, Guerrero         | <i>Z. mays ssp. parviglumis</i> | John Doebley  | G        | Ref        |
| TIL14                   | Rodeo                      | <i>Z. mays ssp. parviglumis</i> | John Doebley  | G        | Ref        |
| TIL15                   | Palo Blanco                | <i>Z. mays ssp. parviglumis</i> | John Doebley  | G        | Ref        |
| TIL17                   | Teloloapan                 | <i>Z. mays ssp. parviglumis</i> | John Doebley  | G        | Ref        |
| TIL3                    | La Lima, Jalisco           | <i>Z. mays ssp. parviglumis</i> | John Doebley  | G        | Ref        |
| TIL9                    | Tejupilco, Mexico          | <i>Z. mays ssp. parviglumis</i> | John Doebley  | G        | Ref        |
| 11368                   | Mexico                     | <i>Z. mays ssp. mexicana</i>    | John Doebley  | G        | Ref        |
| 13792                   | Mexico                     | <i>Z. mays ssp. mexicana</i>    | John Doebley  | A        | Ref        |
| C-18-78                 | Mexico                     | <i>Z. mays ssp. mexicana</i>    | John Doebley  | A        | indel      |
| JSG Y LOS-55            | Mexico                     | <i>Z. mays ssp. mexicana</i>    | John Doebley  | A        | indel      |
| JSG Y LOS-88            | Mexico                     | <i>Z. mays ssp. mexicana</i>    | John Doebley  | A        | Ref        |
| JSG Y MCH-341           | Mexico                     | <i>Z. mays ssp. mexicana</i>    | John Doebley  | A        | indel      |
| JSG,JMHC,K Y<br>FCG-311 | Mexico                     | <i>Z. mays ssp. mexicana</i>    | John Doebley  | A        | Ref        |
| JSG,JMHC,K Y<br>FCG-317 | Mexico                     | <i>Z. mays ssp. mexicana</i>    | John Doebley  | G        | Ref        |
| JSG-373                 | Mexico                     | <i>Z. mays ssp. mexicana</i>    | John Doebley  | G        | Ref        |
| JSG-397                 | Mexico                     | <i>Z. mays ssp. mexicana</i>    | John Doebley  | G        | Ref        |
| Taba 93                 | Mexico                     | <i>Z. mays ssp. mexicana</i>    | John Doebley  | A        | indel      |
| CIMMYT ID13533          | Mexico                     | <i>Z. mays ssp. parviglumis</i> | Xiaohong Yang | G        | Ref        |
| CIMMYT ID13535          | Mexico                     | <i>Z. mays ssp. parviglumis</i> | Xiaohong Yang | G        | Ref        |
| CIMMYT ID13554          | Mexico                     | <i>Z. mays ssp. parviglumis</i> | Xiaohong Yang | G        | Ref        |
| CIMMYT ID13581          | Mexico                     | <i>Z. mays ssp. parviglumis</i> | Xiaohong Yang | G        | Ref        |
| CIMMYT ID13582          | Mexico                     | <i>Z. mays ssp. parviglumis</i> | Xiaohong Yang | A        | Ref        |
| CIMMYT ID13585          | Mexico                     | <i>Z. mays ssp. parviglumis</i> | Xiaohong Yang | G        | Ref        |
| CIMMYT ID13586          | Mexico                     | <i>Z. mays ssp. parviglumis</i> | Xiaohong Yang | G        | Ref        |

| Material      | Location | Subspecies                      | Source        | SNP-1245 | Indel-2339 |
|---------------|----------|---------------------------------|---------------|----------|------------|
| CIMMYT ID8762 | Mexico   | <i>Z. mays ssp. parviglumis</i> | Xiaohong Yang | G        | Ref        |
| CIMMYT ID8763 | Mexico   | <i>Z. mays ssp. parviglumis</i> | Xiaohong Yang | G        | Ref        |
| CIMMYT ID8765 | Mexico   | <i>Z. mays ssp. parviglumis</i> | Xiaohong Yang | G        | Ref        |
| CIMMYT ID8766 | Mexico   | <i>Z. mays ssp. parviglumis</i> | Xiaohong Yang | A        | Ref        |
| CIMMYT ID8767 | Mexico   | <i>Z. mays ssp. parviglumis</i> | Xiaohong Yang | G        | Ref        |
| CIMMYT ID8779 | Mexico   | <i>Z. mays ssp. parviglumis</i> | Xiaohong Yang | A        | Ref        |
| CIMMYT ID8781 | Mexico   | <i>Z. mays ssp. parviglumis</i> | Xiaohong Yang | G        | Ref        |
| CIMMYT ID8782 | Mexico   | <i>Z. mays ssp. parviglumis</i> | Xiaohong Yang | G        | Ref        |
| CIMMYT ID8783 | Mexico   | <i>Z. mays ssp. parviglumis</i> | Xiaohong Yang | G        | Ref        |
| CIMMYT ID8784 | Mexico   | <i>Z. mays ssp. parviglumis</i> | Xiaohong Yang | G        | Ref        |

**Table S2. Information on the 45 teosinte lines used in this study. Related to Figure 1, Figure 3 and Figure 4.**

| Age                   | Sample                | ZCN8_SNP-1245 | ZCN8_Indel-2339 | ZmCCT9_TE    | ZmCCT10_TE | Vgt1_MITE |
|-----------------------|-----------------------|---------------|-----------------|--------------|------------|-----------|
|                       |                       | A/G           | Ref / Del       | Harbinger+/- | CACTA+/-   | MITE+/-   |
| 5,310 years old       | Tehuacan <sup>a</sup> | G             | Ref             | +/+          | +/+        | -/-       |
| 5,300-4,970 years old | SM10 <sup>b</sup>     | G             | Ref             | NA           | +/+        | -/-       |
| 1,900 years old       | JK1689 <sup>c</sup>   | A             | Del             | +/+          | +/+        | -/-       |
| 1,900 years old       | JK1690 <sup>c</sup>   | NA            | Del             | +/+          | +/+        | -/-       |
| 1,900 years old       | JK1691 <sup>c</sup>   | A             | Del             | +/+          | +/+        | -/-       |
| 1,900 years old       | JK1692 <sup>c</sup>   | A             | Del             | +/+          | +/+        | -/-       |
| 1,900 years old       | JK1695 <sup>c</sup>   | A             | Del             | +/+          | +/+        | -/-       |
| 1,900 years old       | JK1696 <sup>c</sup>   | NA            | Del             | +/+          | +/+        | -/-       |
| 1,900 years old       | JK1697 <sup>c</sup>   | A             | Del             | +/+          | +/+        | -/-       |
| 1,900 years old       | JK1698 <sup>c</sup>   | A             | Del             | +/+          | +/+        | -/-       |
| 1,900 years old       | JK1699 <sup>c</sup>   | NA            | Del             | +/+          | +/+        | -/-       |
| 1,900 years old       | JK1700 <sup>c</sup>   | A             | Del             | +/+          | +/+        | -/-       |
| 1,900 years old       | JK1701 <sup>c</sup>   | NA            | NA              | +/+          | +/+        | -/-       |
| 1,900 years old       | JK1703 <sup>c</sup>   | A             | Del             | +/+          | +/+        | -/-       |
| 1,900 years old       | JK1704 <sup>c</sup>   | A             | Del             | +/+          | +/+        | -/-       |
| 1,900 years old       | JK1705 <sup>c</sup>   | NA            | NA              | +/+          | +/+        | -/-       |
| 1,900 years old       | JK1706 <sup>c</sup>   | A             | Del             | +/+          | +/+        | -/-       |

**Table S3. The genotypes of five flowering time loci (*ZCN8\_SNP-1245*, *ZCN8\_Indel-2339*, *ZmCCT9\_TE*, *ZmCCT10\_TE* and *Vgt1\_MITE*) in the archaeological maize specimens. Related to Figure 4 and STAR Methods.**

<sup>a</sup>, the genomic data of SM10 is from Vallebuena-Estrada et al. (2016)[S2]; <sup>b</sup>, the genomic data of Tehuacan is from Ramos-Madrigrál et al. (2016)[S3]; <sup>c</sup>, the genomic data of JK1689-JK1706 is from Swarts et al. (2017)[S4].

| Primer or probe name    | Primer sequence (5'-3')                                | Description                                                |
|-------------------------|--------------------------------------------------------|------------------------------------------------------------|
| ZCN8_10F                | CTGGAATGGCCTGAAATACG                                   | Sequencing the 6.3 kb region                               |
| ZCN8_10R                | ACAGCTAAGCCGTTGATAATTG                                 |                                                            |
| ZCN8-up-2L              | GACTTCTCGCTATTAGTTGGACC                                | Sequencing the 6.3 kb region                               |
| ZCN8-up-2R              | CAGATTTGGTTTACACACGGTT                                 |                                                            |
| ZCN8-up-3L              | ACTTCCATTACGAGAGGAGG                                   | Sequencing the 6.3 kb region                               |
| ZCN8-up-3R              | AAGGCTGTGATTGTGAGGTT                                   |                                                            |
| ZCN8-up-4L              | AGGGAGTTTGCTCGTAAGGTG                                  | Sequencing the 6.3 kb region                               |
| ZCN8-up-4R              | TTAGTGATGGATGGCTTGGA                                   |                                                            |
| ZCN8-1L                 | TTTCTACACCCTGGTAAGCC                                   | Sequencing the 6.3 kb region                               |
| ZCN8-1R                 | GCTCTCAACCTTCAAGTCA                                    |                                                            |
| ZCN8-4L                 | GGAAGAGTAGAAACCATAGGC                                  | Sequencing the 6.3 kb region                               |
| ZCN8-4R                 | GAGGCAAAGAAGAAGATAGATG                                 |                                                            |
| 1245caps-1L             | GAGAGGGACAGACTAGAATCCT                                 | Genotyping<br>SNP-1245(CAPs,MSP I)                         |
| 1245caps-1R             | GCAAAGTTTCGCCAAATGTCTA                                 |                                                            |
| 2339-1L                 | GATTTTCGTATCRACGTCATG                                  | Genotyping Indel-2339                                      |
| 2339-1R                 | GAAAGTTTGCATCGCGTAGTTC                                 |                                                            |
| <i>Vgt1</i> _MITE_L     | GTACCAGCTCCCTCTGCTC                                    | Genotyping the MITE<br>transposon insertion at <i>Vgt1</i> |
| <i>Vgt1</i> _MITE_R     | TGGAATGGATGTGAAGTGAG                                   |                                                            |
| qRT- <i>ZmMADS1</i> _2L | TGAAGCAGAAGGAGATGAGT                                   | qRT-PCR                                                    |
| qRT- <i>ZmMADS1</i> _2R | GCAATCCTATGTACAGCTCCG                                  |                                                            |
| qRT-ZCN8_L              | ACTTGCACTGGATGGTGACAGATA                               | qRT-PCR                                                    |
| qRT-ZCN8_R              | CGGCCTCTCATAAAAATTAGCTCTT                              |                                                            |
| Bio-W22-L               | CGCAGTACATGTTCAAACAACCCGAGAAA<br>AAAACACACATCGAAGAAGAA | EMSA probe                                                 |
| Bio-W22-R               | TTCTTCTCGATGTGTGTTTTTCTCGGGTT<br>TGTTGAACATGTA CTGCG   |                                                            |
| Bio-Teosinte-L          | CGCAGTACATGTTCAAACAACCCGGGAAA<br>AACACACATCGAAGAAGAA   | EMSA probe                                                 |
| Bio-Teosinte-R          | TTCTTCTCGATGTGTGTTTTTCCCGGTTTG<br>TTGAACATGTA CTGCG    |                                                            |

**Table S4. Sequences of the primers or probes used in this study. Related to Figure 1-4.**

## Supplemental references

- S1. Bukowski, R., Guo, X., Lu, Y., Zou, C., He, B., Rong, Z., Wang, B., Xu D., Yang, B., Xie, C., et al. (2018). Construction of the third-generation *Zea mays* haplotype map. *GigaScience* 7, 1-12.
- S2. Vallebuenaestrada, M., Rodríguezarávalo, I., Rougoncardoso, A., Martínez, G.J., García, C.A., Montiel, R., and Viellecalzada, J.P. (2016). The earliest maize from San Marcos Tehuacán is a partial domesticate with genomic evidence of inbreeding. *Proc. Natl. Acad. Sci. USA* 113, 14151.
- S3. Ramosmadrigal, J., Smith, B.D., Morenomayar, J.V., Gopalakrishnan, S., Rossibarra, J., Gilbert, M.T., and Wales, N. (2016). Genome Sequence of a 5,310-Year-Old Maize Cob Provides Insights into the Early Stages of Maize Domestication. *Current Biology* 26, 3195-3201.
- S4. Swarts, K., Gutaker, R.M., Benz, B., Blake, M., Bukowski, R., Holland, J., Krusepeoples, M., Lepak, N., Prim, L., and Romain, M.C. (2017). Genomic estimation of complex traits reveals ancient maize adaptation to temperate North America. *Science* 357, 512.
