# Supplementary material
Source: PubMed Central journal article supplement (PMC6537595)
Supplement: NIHMS1023689-supplement-5.pdf [file NIHMS1023689-supplement-5.pdf]

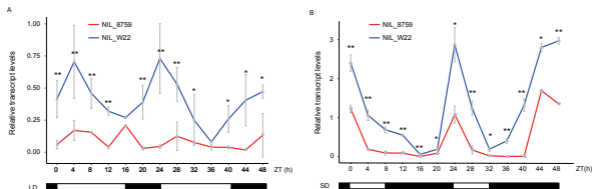

**Figure S1. Diurnal expression pattern of *ZCN8* in mature leaves of NIL(W22) and NIL(8759) under natural long day condition (A) and short day condition (B). Related to Figure 2.**

The black bars and white bars indicate the dark period and the light period, respectively. ZT, zeitgeber time. All data are expressed relative to the control gene *ZmTubulin1* and represent as the means  $\pm$  s.d. of three biological replicates. The single and double asterisks represent significant differences determined by Student's *t* test at  $P < 0.05$  and  $P < 0.01$ , respectively.

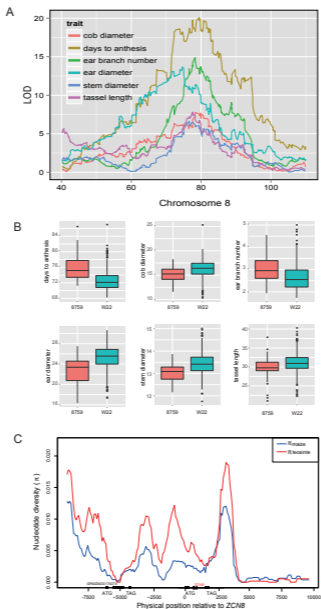

**Figure S2. *ZCN8* is located in a QTL hotspot affecting many domestication traits and was targeted by selection. Related to Figure 4.**

(A) Logarithm of odds (LOD) scores of scanning positions for different traits. (B) Allele effect at the QTL for different traits. (C) Nucleotide diversity around *ZCN8* region in maize and teosinte (HapMap 3 data)[S1]. The promoter region of *ZCN8* exhibited an obvious reduction of nucleotide diversity in maize relative to teosinte. *GRZM2G179274* is the upstream neighboring gene of *ZCN8*.

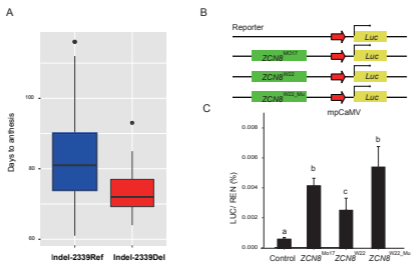

**Figure S3. Indel-2339 shows significant association with flowering time and affects gene expression, related to Figure 3.**

(A) Flowering time difference at Indel-2339 in the association panel under natural long day conditions. Maize lines carrying the 3-bp deletion (Indel-2339Del) flowered significantly earlier than those carrying the B73 reference allele (Indel-2339Ref). (B) Constructs used to test the effect of the Indel-2339 on gene expression in transient expression assays in maize leaf protoplasts. The luciferase (*LUC*) gene driven by a ~3-kb promoter sequence from W22 or Mo17 was used as the reporter. To examine the effect of Indel-2339, nucleotides GAG at the Indel-2339 site in the W22 construct was site-directed deleted. (C) The effect of Indel-2339 on gene expression. The Mo17 construct exhibited higher luciferase activity than the W22 construct. When nucleotides GAG at the Indel-2339 site in the W22 construct was site-directed deleted, the luciferase activity increased to a level of that of the Mo17 construct. Values are presented as the means  $\pm$  s.d. ( $n=5$  biological replicates); The differences in luciferase activity were determined by Student's *t* test ( $P < 0.05$ ).
